# Supplementary material
Source: Springer Nature journal article supplement (https://www.springermedizin.de/resource/supplementary/12885_2012_3644_MOESM2_ESM.pdf/9465038)

## A. Without GPAP

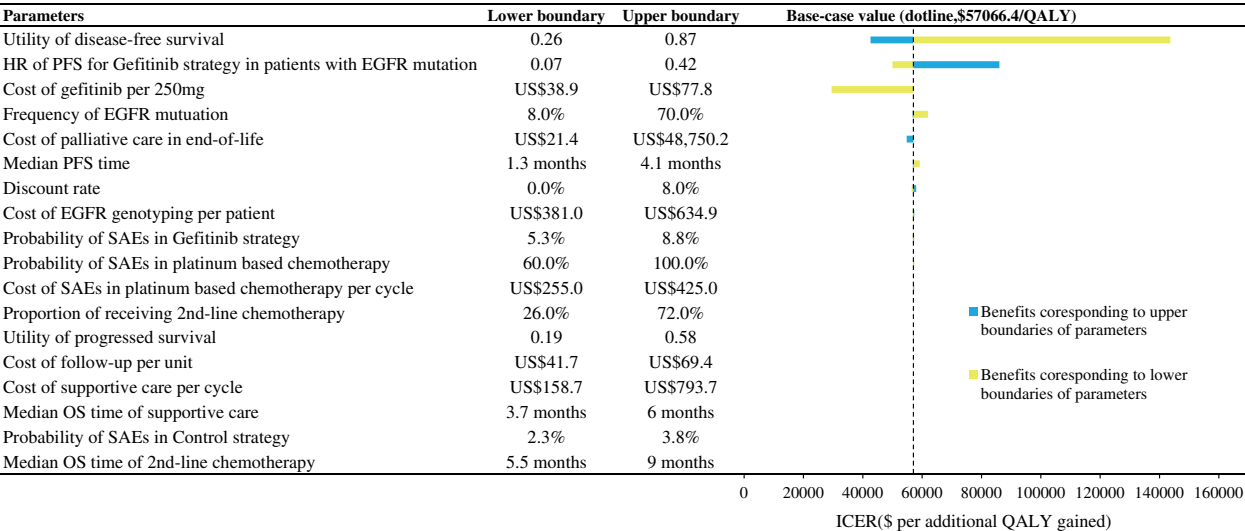

## B. With GPAP

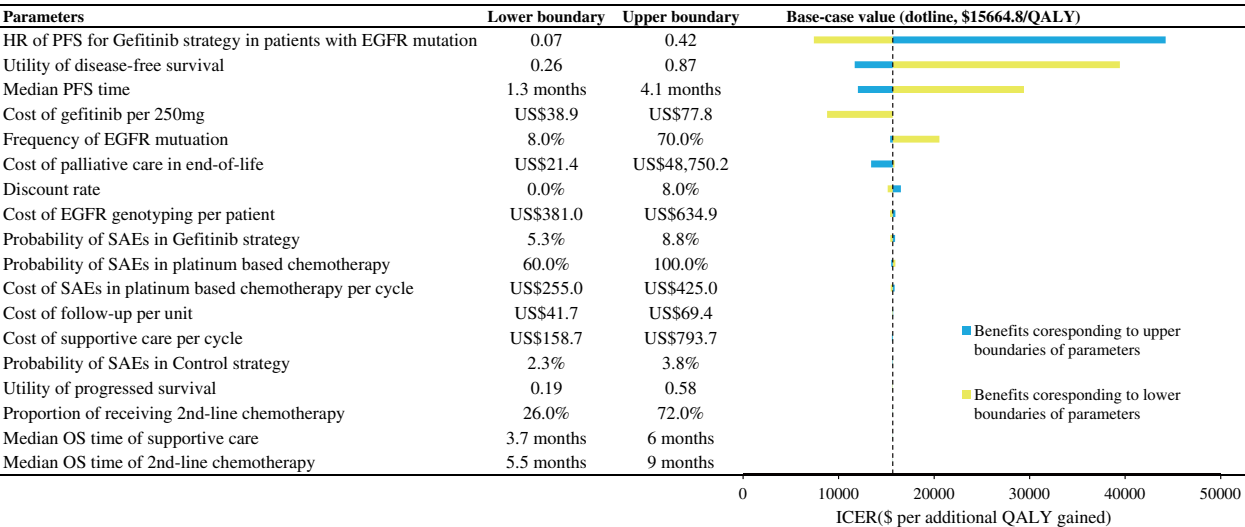

Supplement: MOESM2 [file 9465038]
